# Supplementary material for: TRPV6 Channel Is Involved in Pancreatic Ductal Adenocarcinoma Aggressiveness and Resistance to Chemotherapeutics
Source: MDPI journal article supplement (doi:10.3390/cancers15245769), 2023-12-08
Supplement: s1 [file s1]

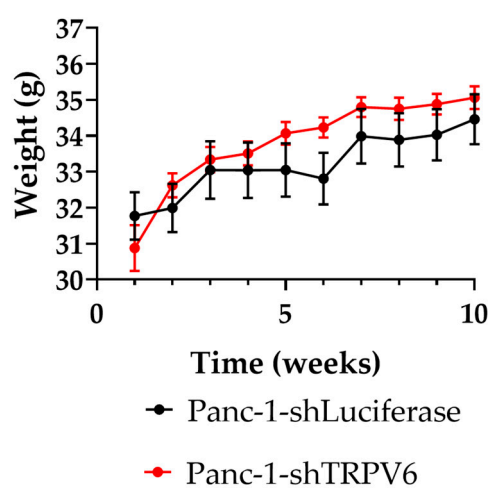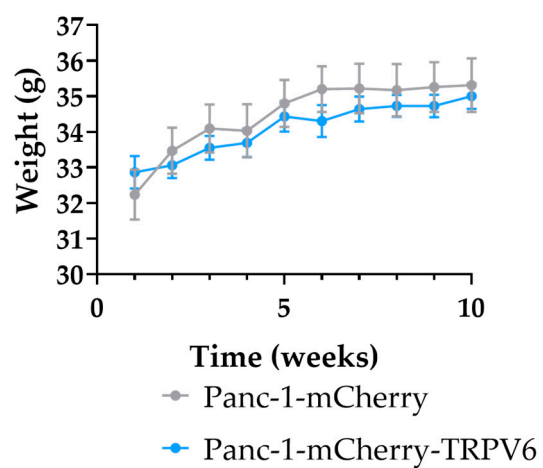

Figure S1. Weight curve of the animals throughout the in vivo experiment.

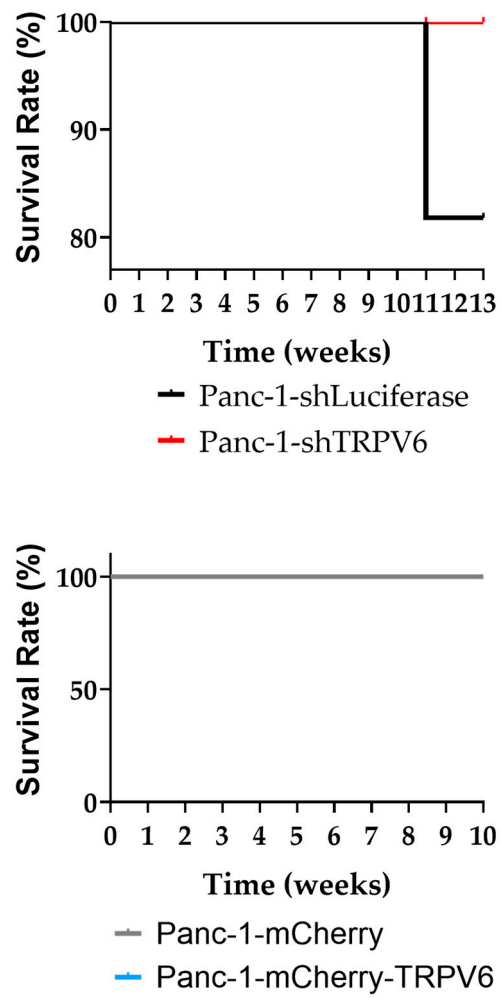

Figure S2. Survival curve of the animals throughout the in vivo experiment.
